# Supplementary material
Source: PubMed Central journal article supplement (PMC7929152)
Supplement: bjs11746-sup-0004-figures3.pdf [file bjs11746-sup-0004-figures3.pdf]

**Best estimate**

**Minimum estimate**

**Maximum estimate**

**Annual total surgical volume**

266,146,964

220,096,402

344,383,396

**Annual adult surgical volume**

245,158,575

202,777,999

317,287,109

**Annual adult elective surgical volume**

170,195,382

140,782,419

220,829,379

**Estimated cancellations over 1 year**

123,086,612

86,012,996

190,431,246

**Estimated cancellations over 12 weeks**

28,404,603

19,849,153

43,945,672
