# Supplementary material
Source: PubMed Central journal article supplement (PMC7929152)

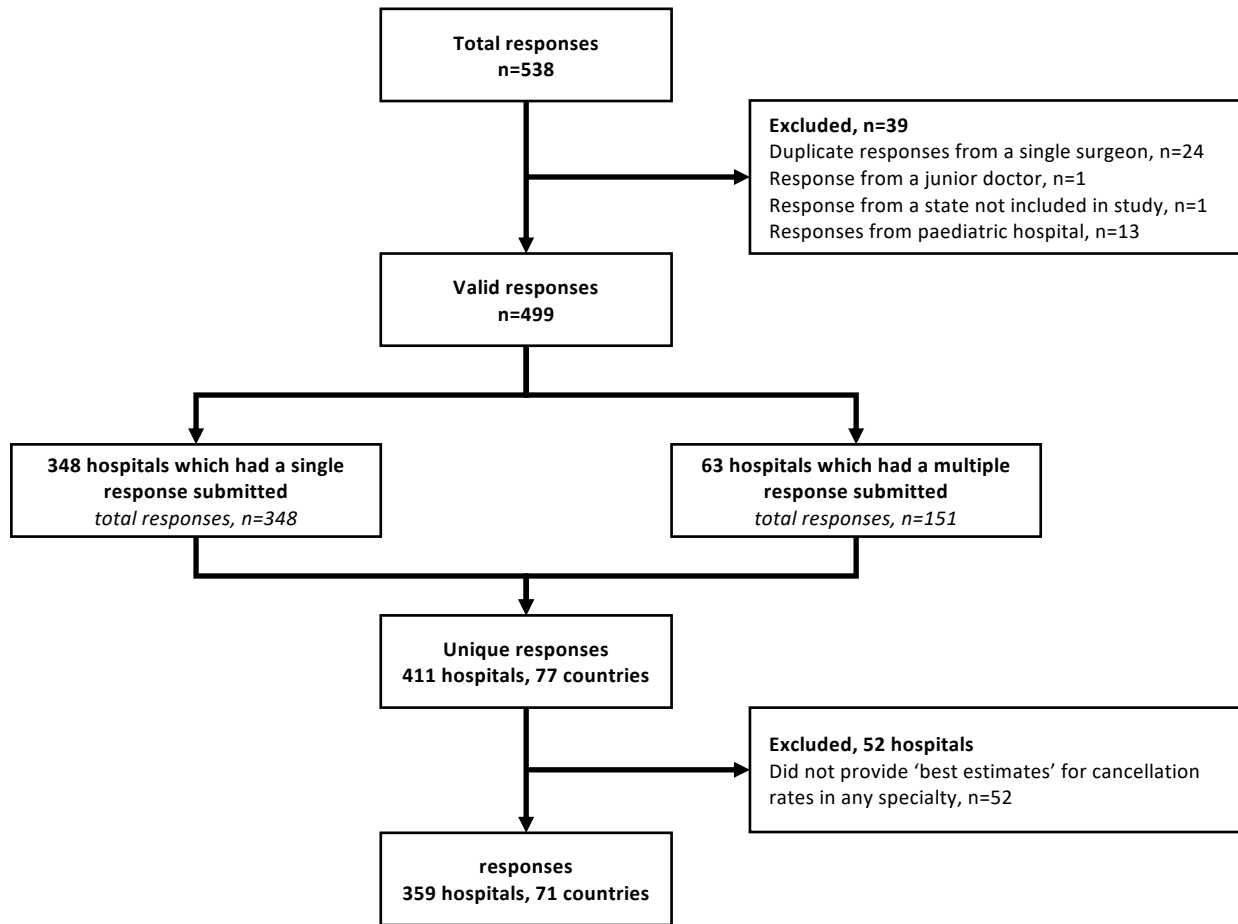

Supplement: bjs11746-sup-0002-figures1.pdf [file bjs11746-sup-0002-figures1.pdf]

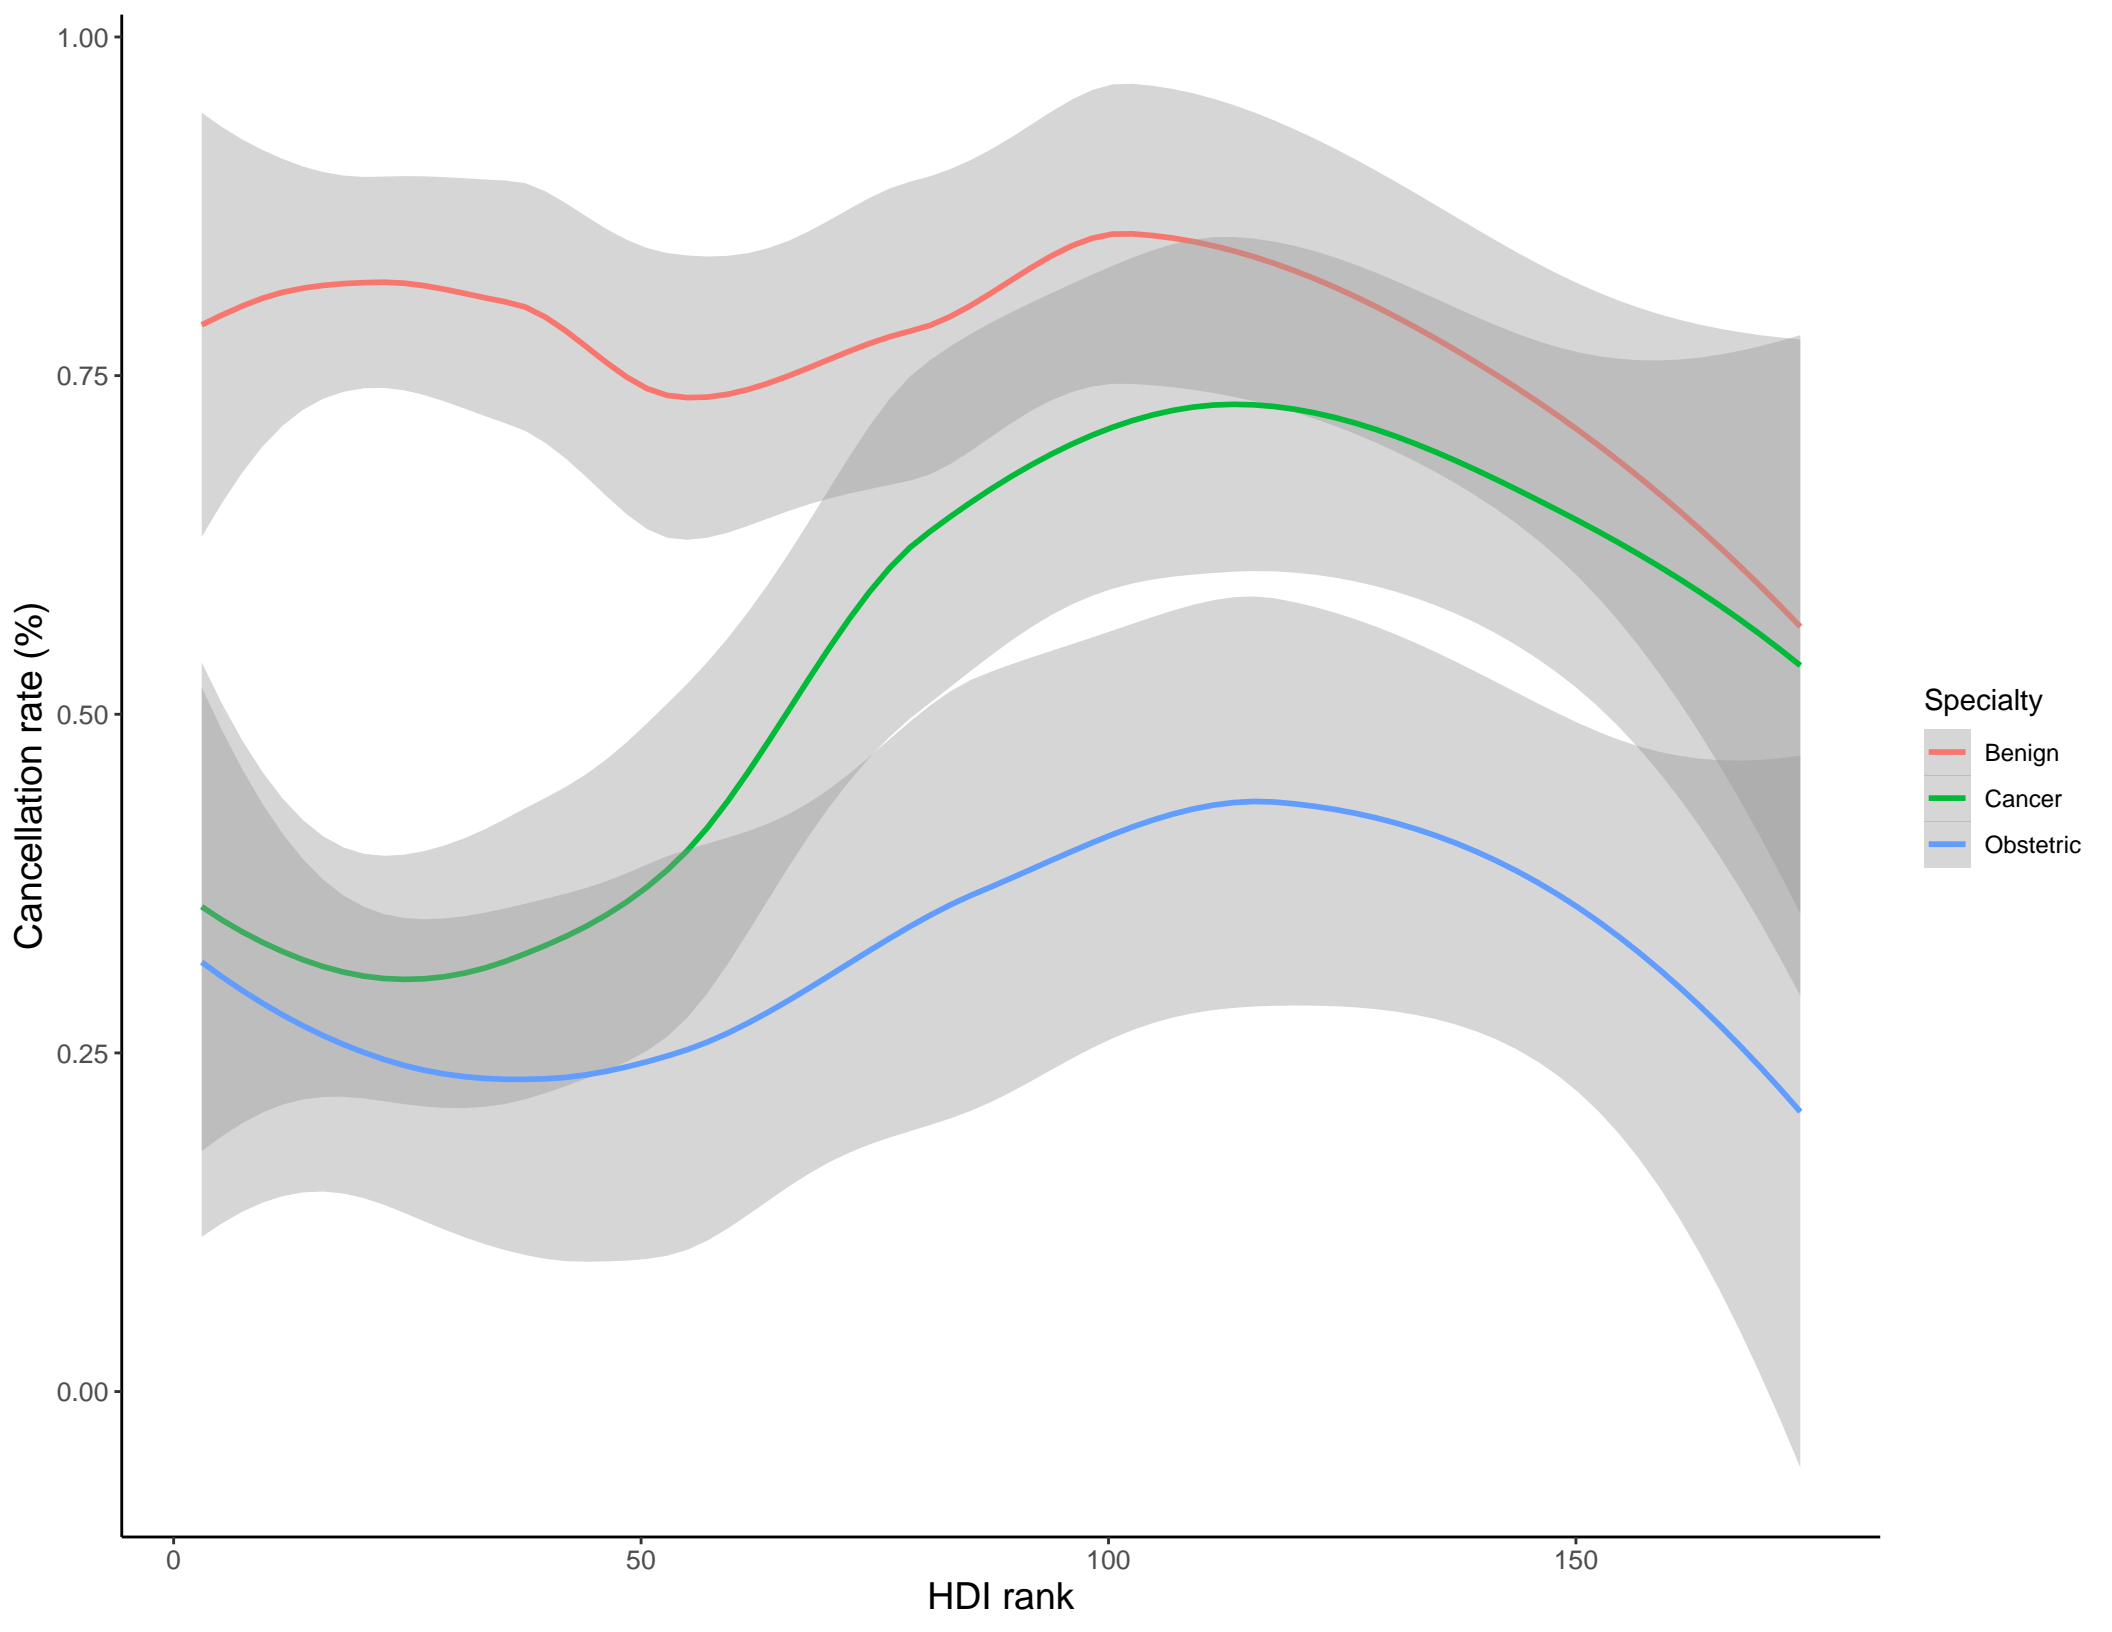

Supplement: bjs11746-sup-0003-figures2.pdf [file bjs11746-sup-0003-figures2.pdf]

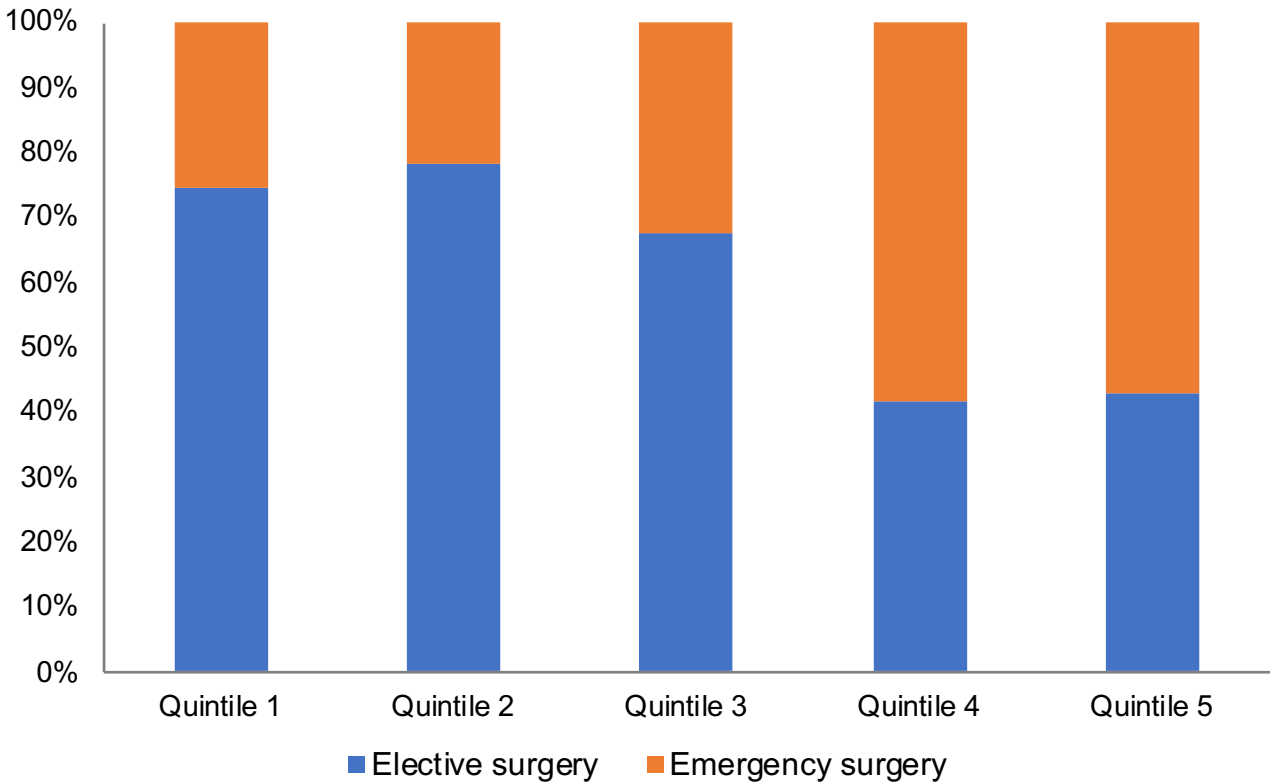

Supplement: bjs11746-sup-0005-figures4.pdf [file bjs11746-sup-0005-figures4.pdf]

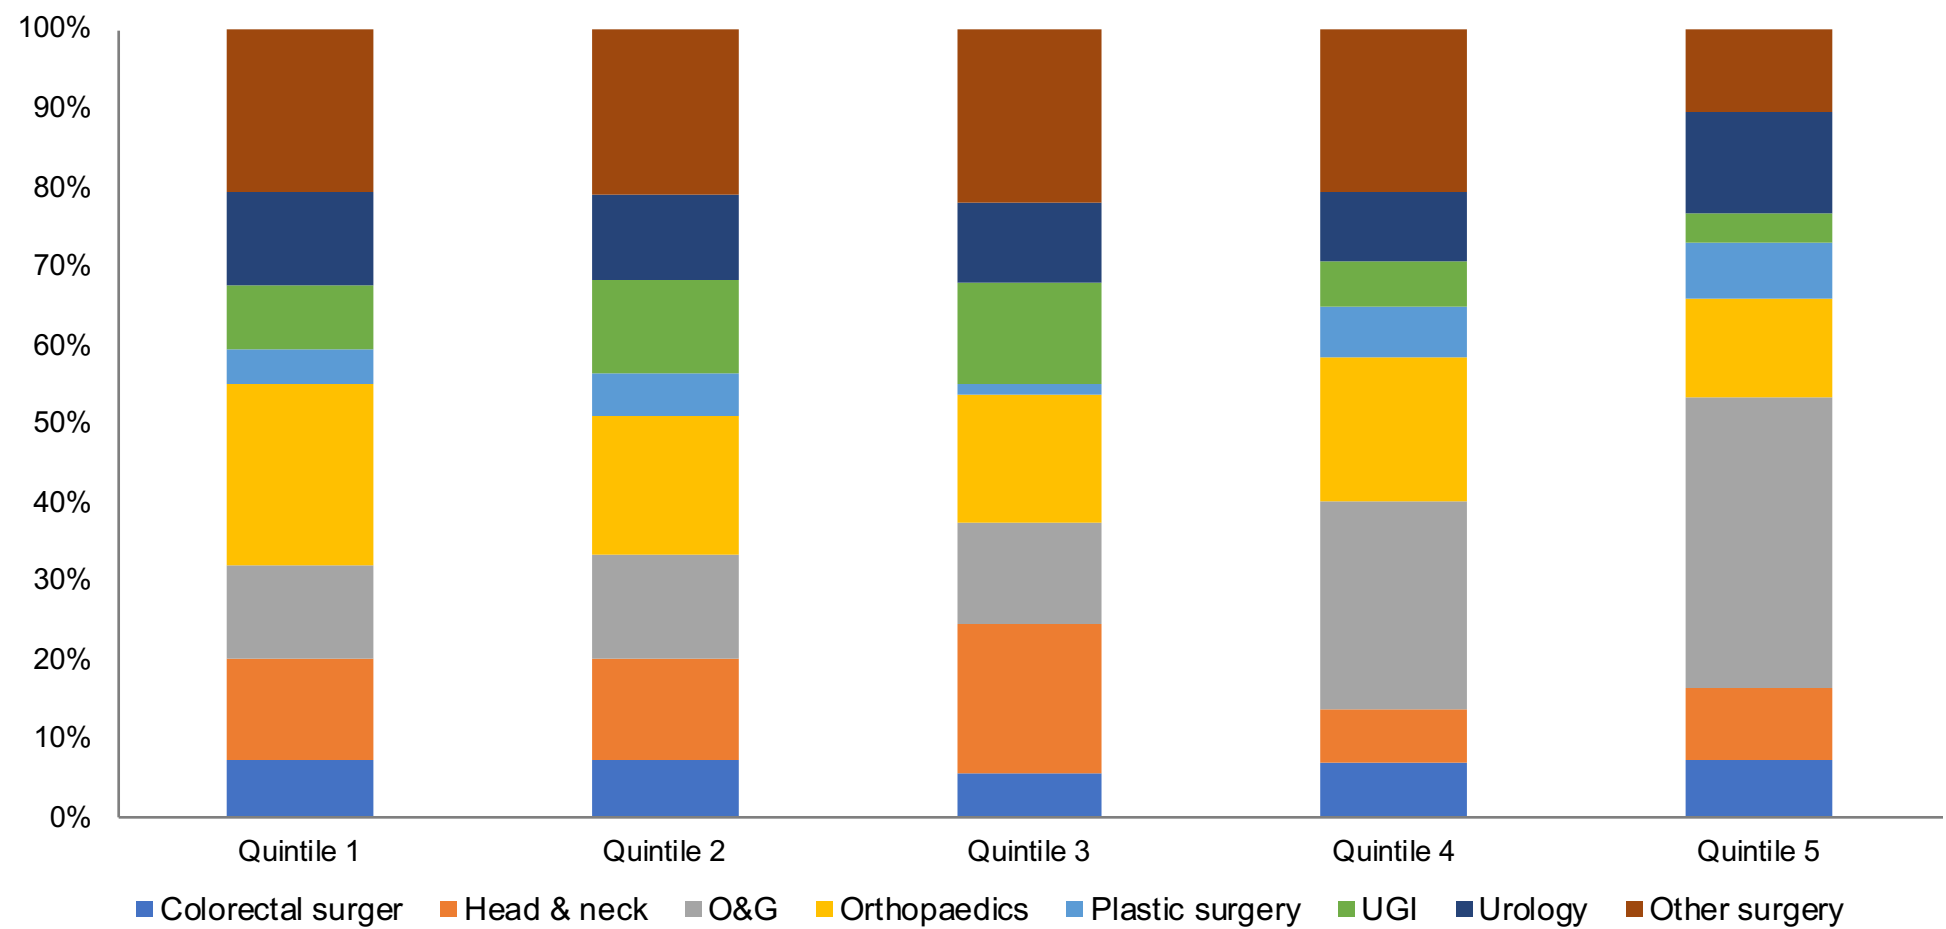

Supplement: bjs11746-sup-0006-figures5.pdf [file bjs11746-sup-0006-figures5.pdf]

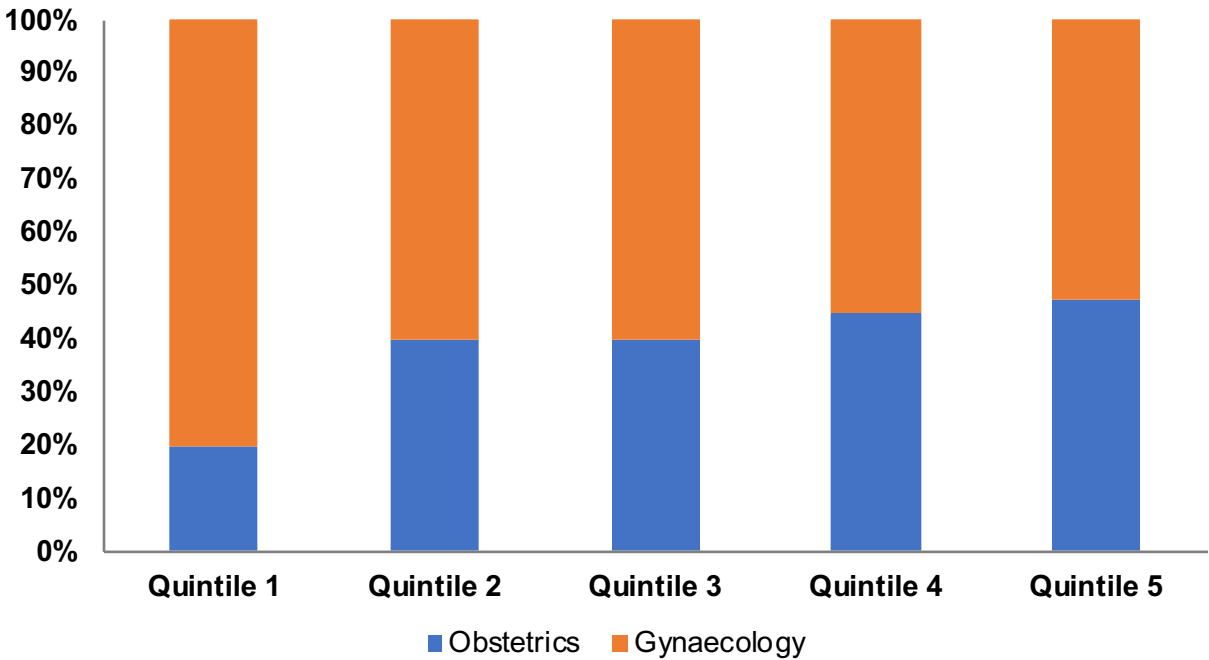

Supplement: bjs11746-sup-0007-figures6.pdf [file bjs11746-sup-0007-figures6.pdf]

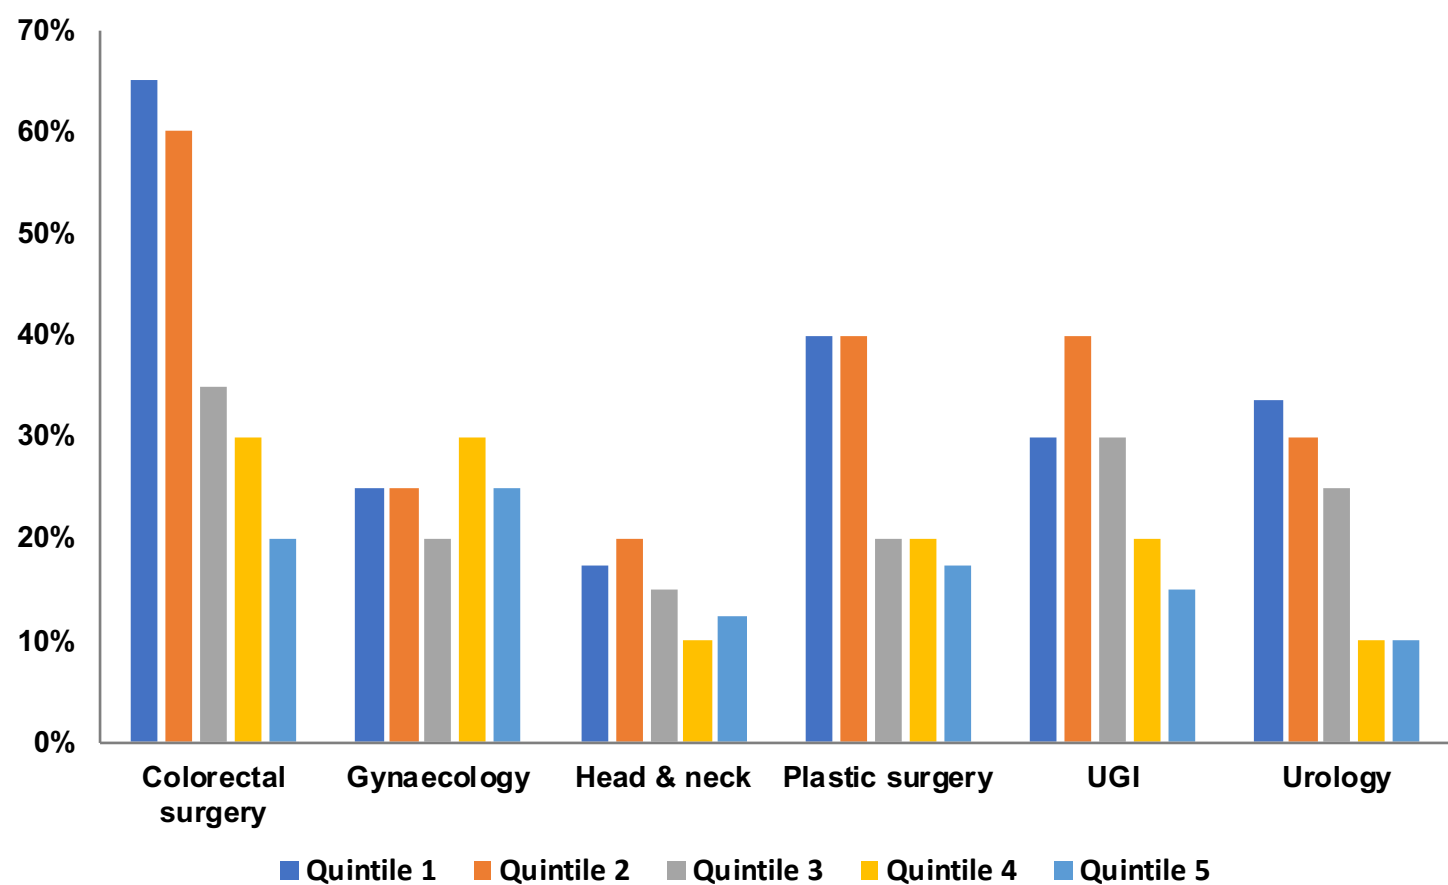

Supplement: bjs11746-sup-0008-figures7.pdf [file bjs11746-sup-0008-figures7.pdf]
